# Supplementary material for: Possibility for Prevention of Type 2 Diabetes Mellitus and Dementia Using Three Kinds of Brown Rice Blends after High-Pressure Treatment
Source: MDPI journal article supplement (doi:10.3390/foods11060818), 2022-03-12
Supplement: s1 [file s1]

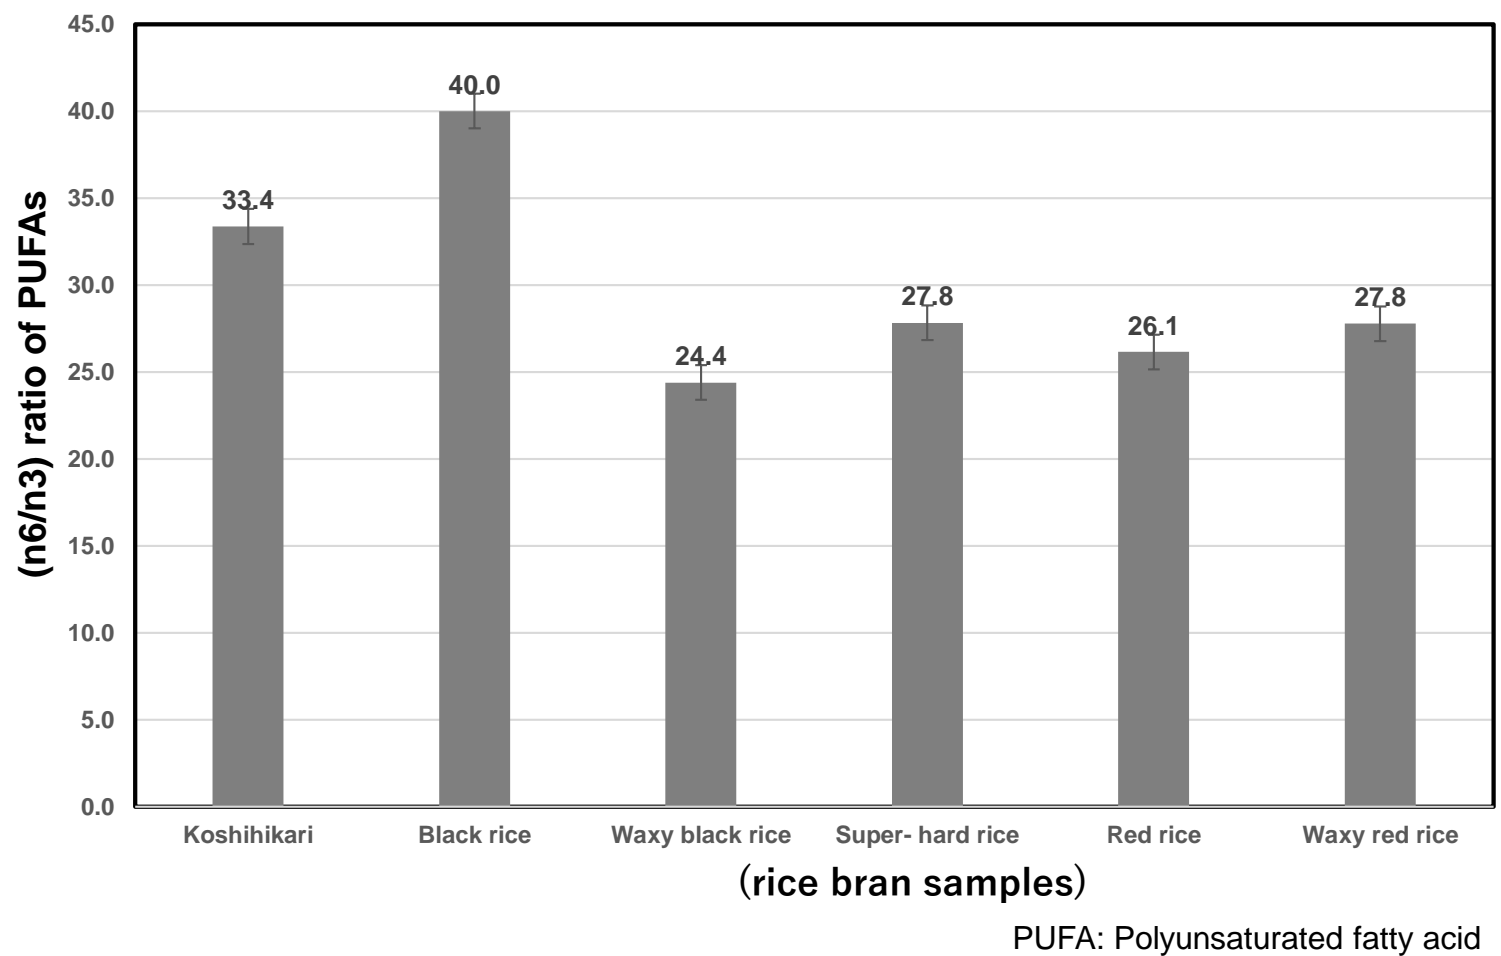

Supplemental Fig S1. n6/n3 ratio of PUFAs of 6 kinds of japonica rice bran

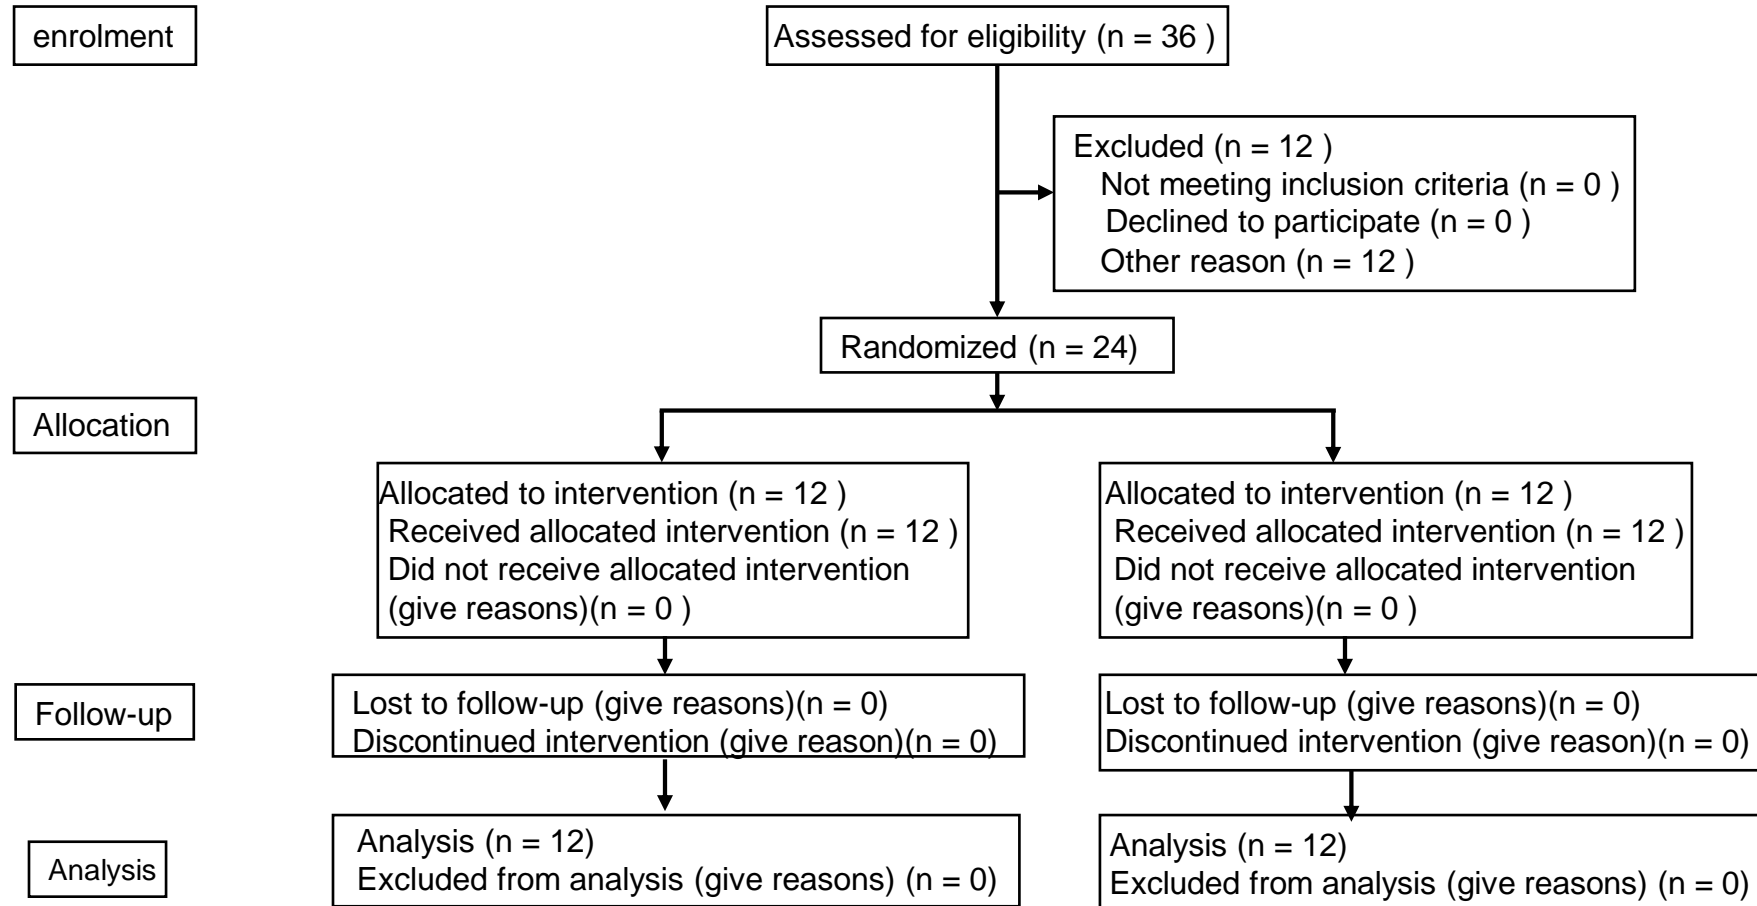

Supplemental Fig S2. Flow diagram of the progress through the phases of a parallel randomized trial of two groups.

Supplemental Table S1. The principal ingredients of 2 kinds of cooked rice for Human test.

|                   | Test meal | Control meal |
|-------------------|-----------|--------------|
| Daily intake (g)  | 190.0     | 200.0        |
| Carbohydrates (g) | 64.0      | 66.8         |
| Protein (g)       | 6.3       | 4.8          |
| Lipid (g)         | 2.9       | 1.0          |
| Moisture (g)      | 116.0     | 127.0        |
| Mineral (mg)      | 1.1       | 0.2          |
| Dietary fiber (g) | 16.2      | 0.8          |
| Anthocyanin (mg)  | 15.2      | 0.0          |
| Energy (Kcal)     | 268.0     | 294.0        |

Supplemental Table S2. Difference in appearance among of cooked rice of ordinary white rice, brown rice and wax-free brown rice.

|                                                          | <b>WB</b>           | <b>L*</b>           | <b>a*</b>            | <b>b*</b>           |
|----------------------------------------------------------|---------------------|---------------------|----------------------|---------------------|
|                                                          | <b>Whiteness</b>    | <b>Brightness</b>   | <b>Redness</b>       | <b>Yellowish</b>    |
| <b>Cooked rice of white rice of Koshihikari</b>          | <b>25.3 ± 1.0 a</b> | <b>58.2 ± 1.5 a</b> | <b>-3.2 ± 0.0 a</b>  | <b>1.4 ± 0.9 a</b>  |
| <b>Cooked rice of brown rice of Koshihikari</b>          | <b>16.4 ± 0.1 b</b> | <b>54.4 ± 0.1 b</b> | <b>-1.6 ± 0.2 b</b>  | <b>11.9 ± 0.1 b</b> |
| <b>Cooked rice of wax-free brown rice of Koshihikari</b> | <b>22.5 ± 4.3 a</b> | <b>59.7 ± 2.7 a</b> | <b>-2.1 ± 0.7 ab</b> | <b>9.1 ± 0.5 c</b>  |

Within each measure (WB, L\*, a\*, and b\* ) in the same column, different letters (a, b, etc) denote statistically significant differences.
